# Supplementary material for: Vibrio cholerae motility exerts drag force to impede attack by the bacterial predator Bdellovibrio bacteriovorus
Source: PubMed Central journal article supplement (PMC6232129; doi:10.1038/s41467-018-07245-3), 2018-11-12
Supplement: 41467_2018_7245_MOESM1_ESM.pdf [file 41467_2018_7245_MOESM1_ESM.pdf]

**Supplementary Information**

***Vibrio cholerae* motility exerts drag force to impede attack by the bacterial predator *Bdellovibrio bacteriovorus***

Duncan *et al.*

Supplementary Figure 1a

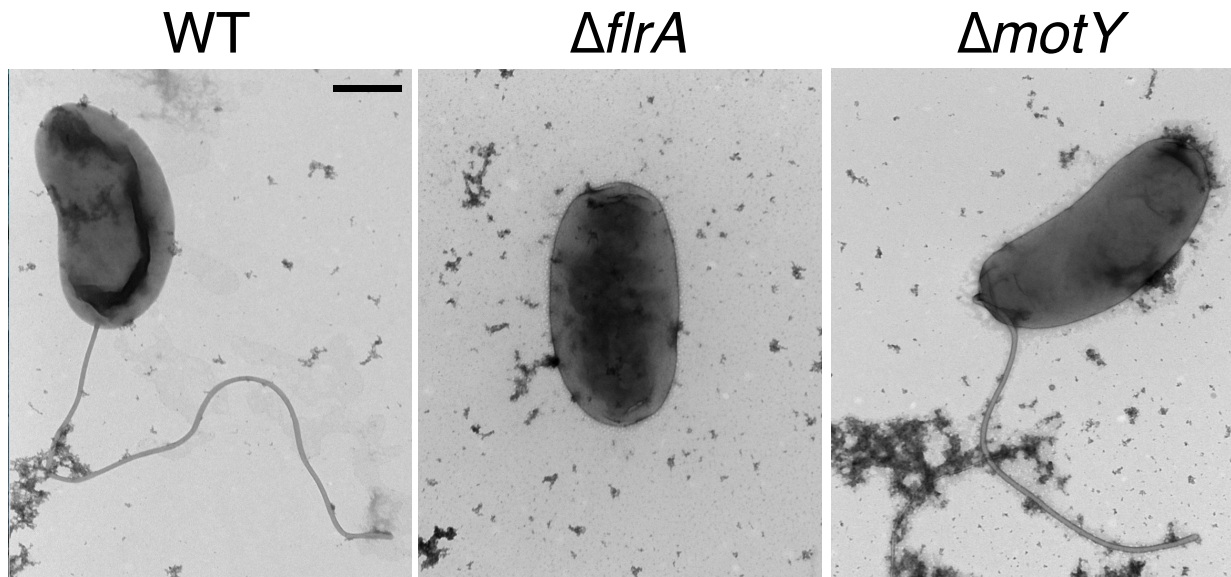

Supplementary Figure 1b

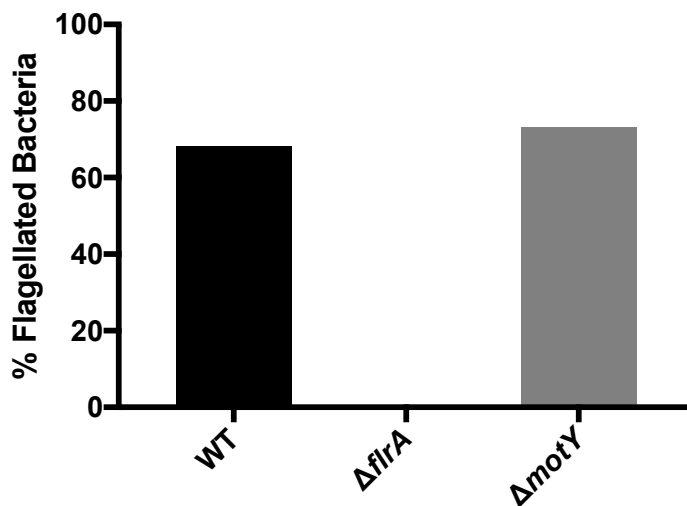

**Supplementary Figure 1.** The non-motile  $\Delta flrA$  strain lacks flagella. **a**, Representative transmission electron microscopy images show the  $\Delta flrA$  mutant lacks flagella, while  $\Delta motY$  is also non-motile but retains its flagella. The scale bar indicates 500nm. **b**, The percent of flagellated bacteria for each strain is shown. Only one out of 113  $\Delta flrA$  bacteria possessed a flagellum.

Supplementary Figure 2

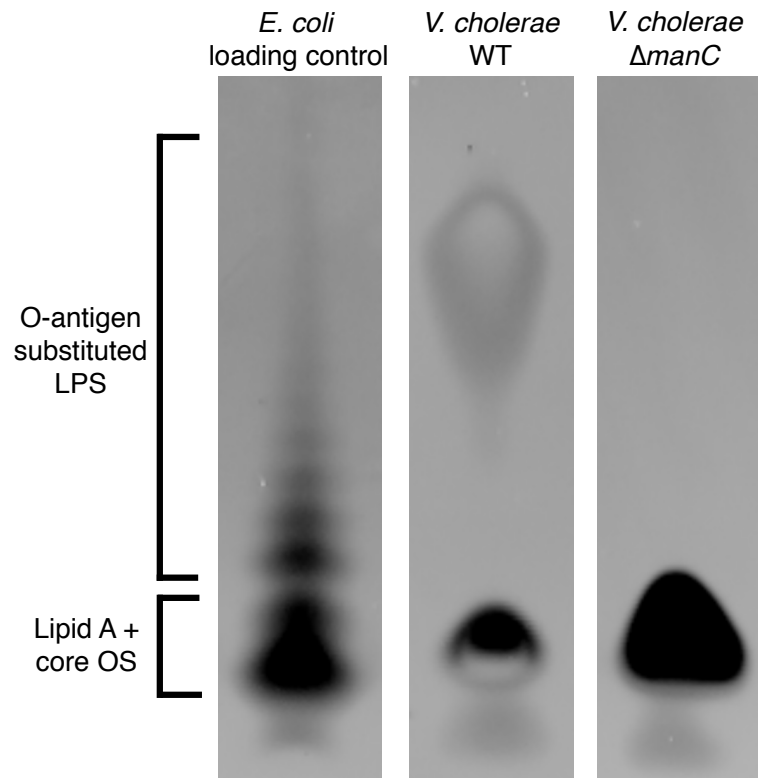

**Supplementary Figure 2. The  $\Delta manC$  strain does not produce O-antigen.** Silver stain of an SDS-page gel following phenol extraction of LPS. Consistent with previous studies, the  $\Delta manC$  mutant produces no observable O-antigen when compared to WT *V. cholerae*.

Supplementary Figure 3

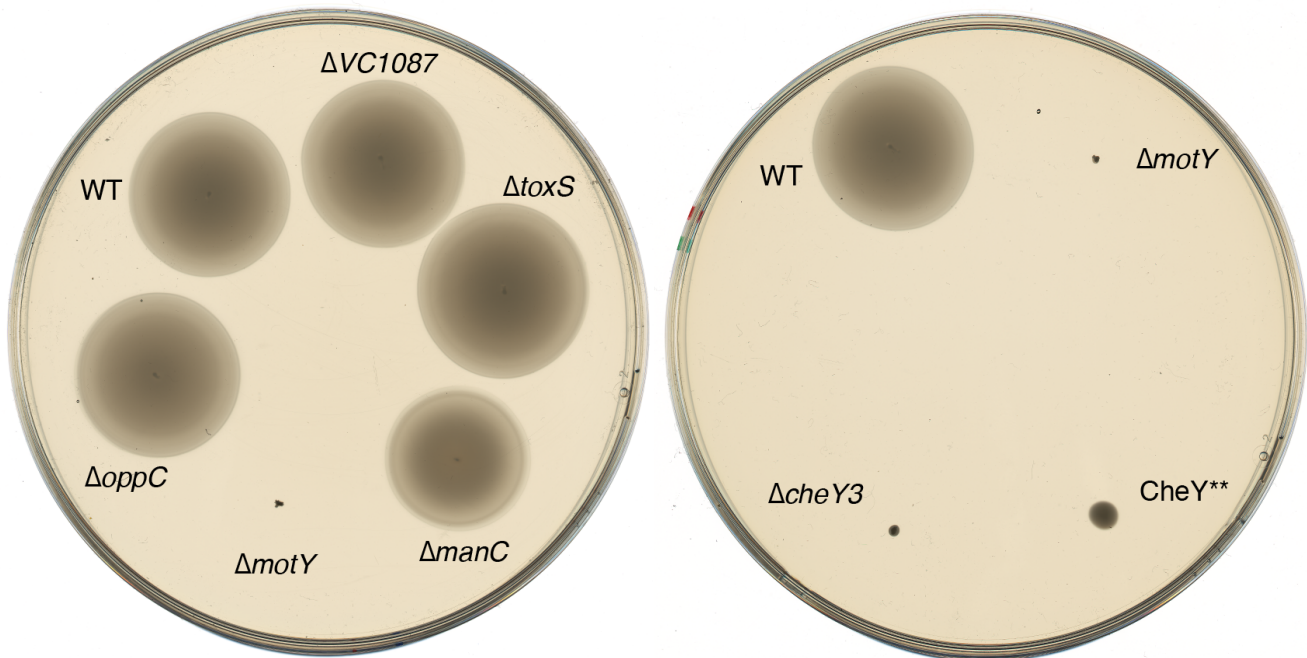

**Supplementary Figure 3. Soft agar motility assay.** Each mutant strain shows a similar swimming diameter compared to WT *V. cholerae* apart from the non-motile  $\Delta motY$  strain and the chemotaxis mutant  $\Delta cheY3$  and  $CheY^{**}$  strains.

Supplementary Figure 4.

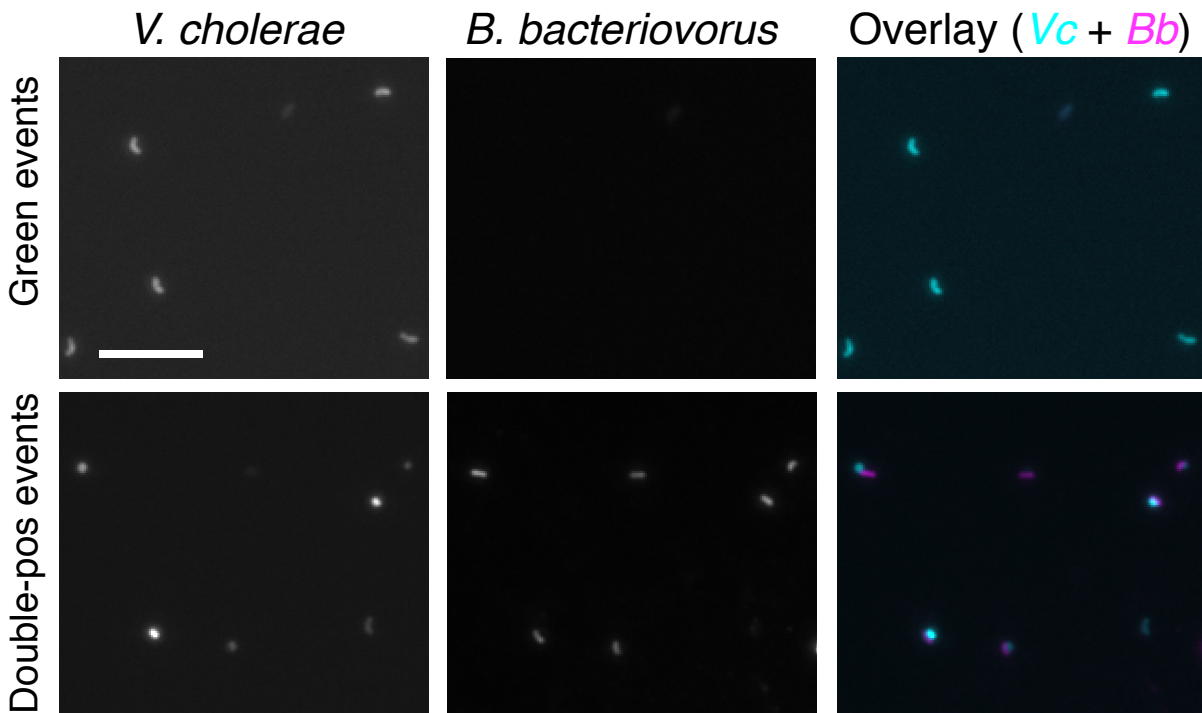

**Supplementary Figure 4. Sorting and fluorescence microscopy to confirm flow cytometry distinguishes green-only and double-positive events.** We sorted the two relevant populations into separate tubes and observed the cells by fluorescence microscopy. The gating strategy correctly identified green-only (*V. cholerae*) and double-positive (*V. cholerae* + *B. bacteriovorus*) events. In the overlay panels, *V. cholerae* are cyan and *B. bacteriovorus* are magenta.

Supplementary Figure 5

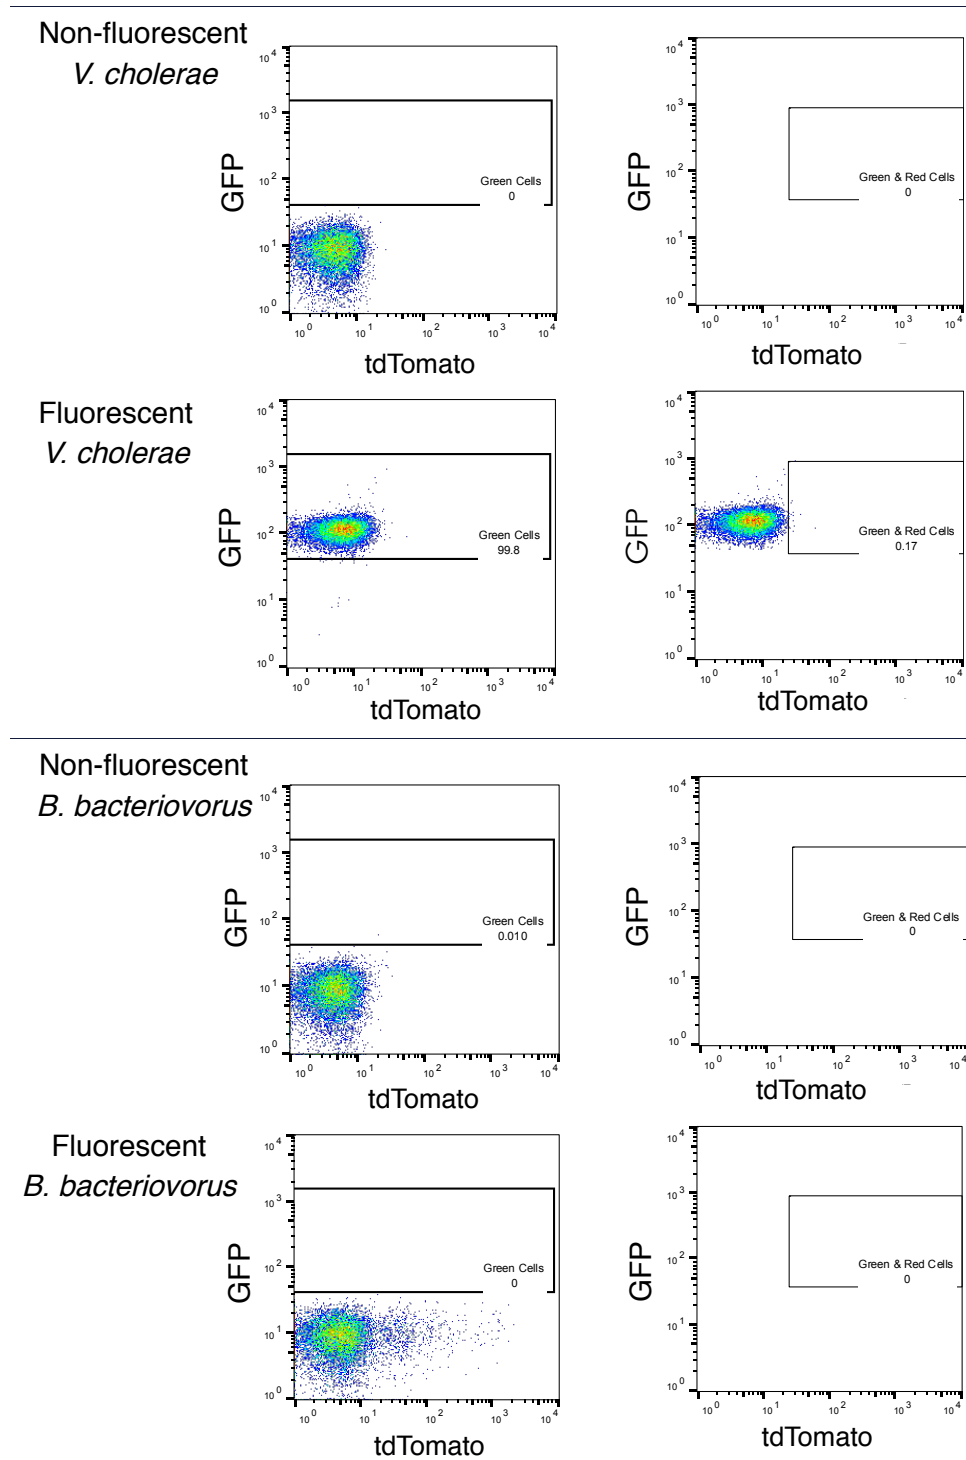

**Supplementary Figure 5 Gating strategy for flow cytometry analysis of *B.***

***bacteriovorus* interaction with *V. cholerae*.** 10,000 events were collected for each sample. The gating strategy was designed to limit false-positive interactions.

Supplementary Figure 6

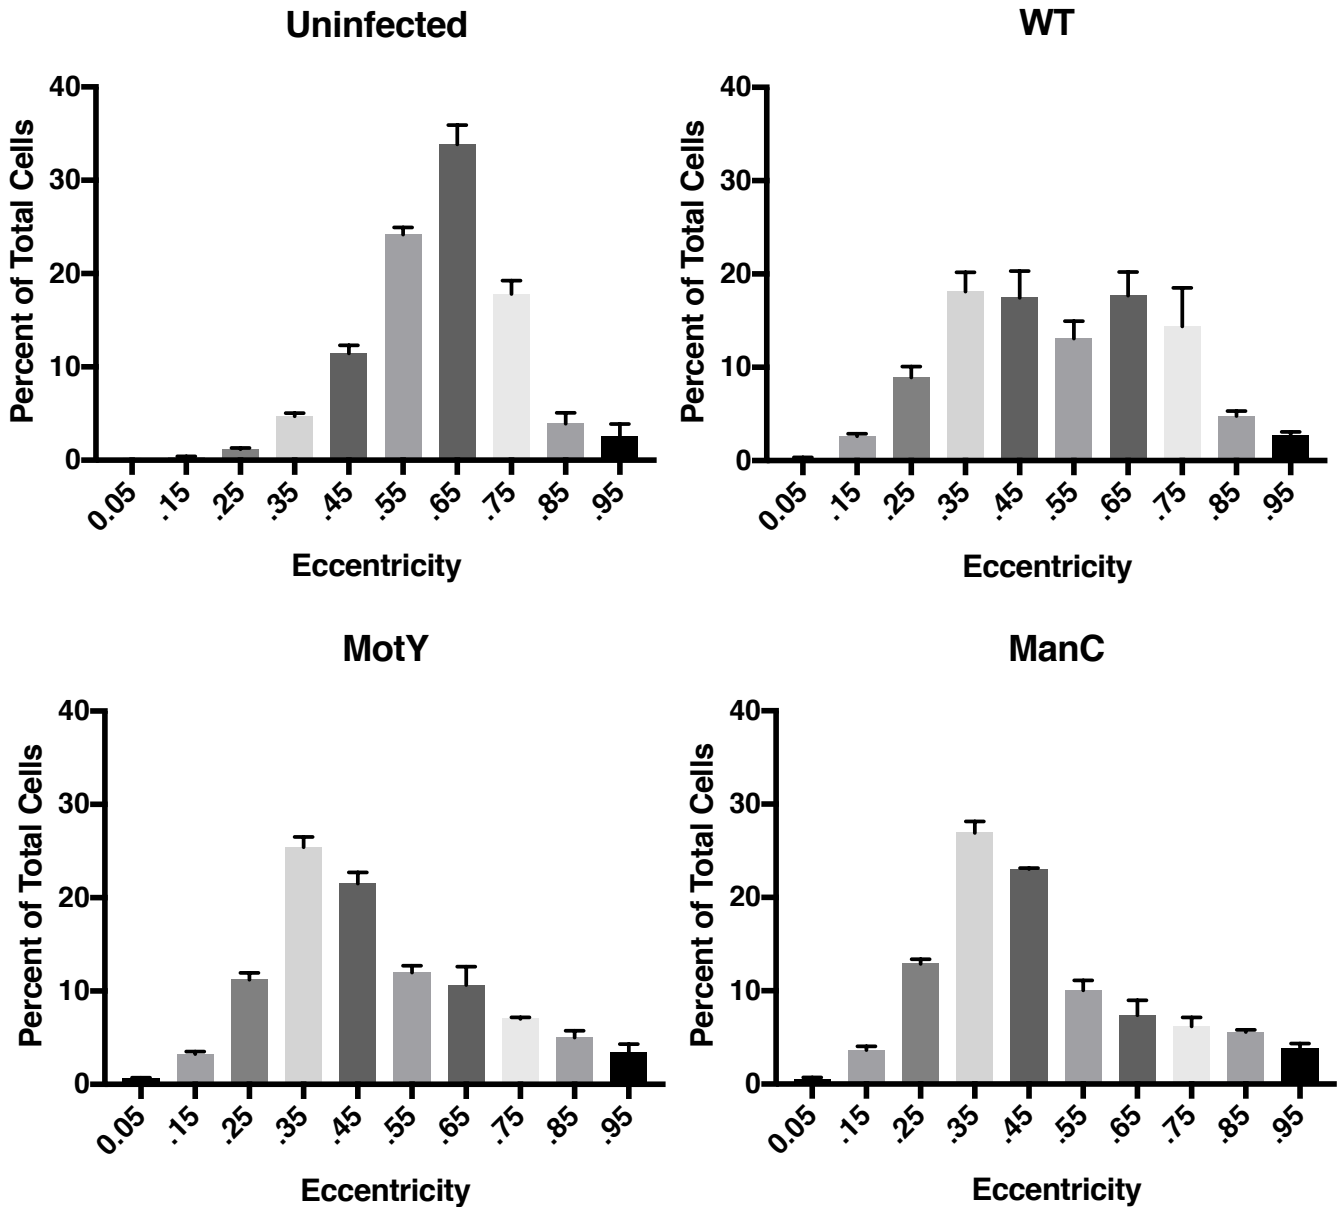

Supplementary Figure 6. Histograms of eccentricity values used in Fig 4b.

Eccentricity values closer to zero indicate more rounded cells. Each bar represents cell values within 0.05 of the marked value. The average is shown for three biological replicates. Error bars represent standard error of the mean.

Supplementary Figure 7

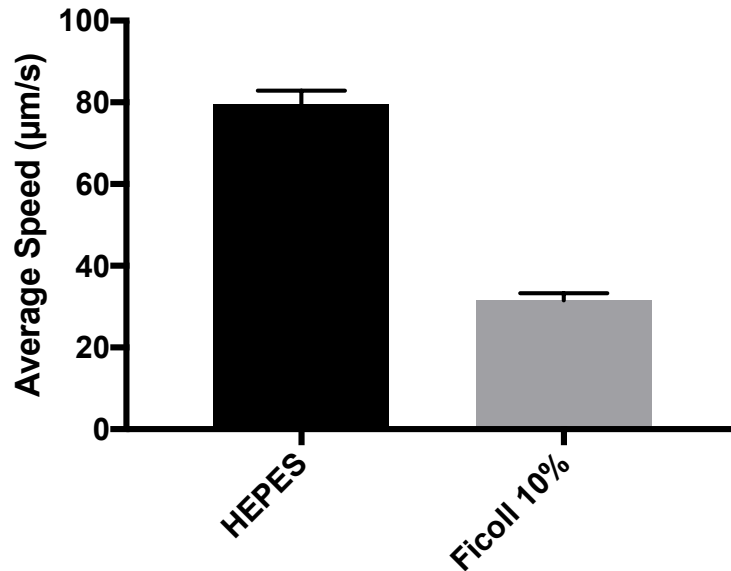

**Supplementary Figure 7. 10% ficoll decreases *V. cholerae* swimming speed 2.5-fold.** A 10% ficoll solution in HEPES reduces *V. cholerae* swimming speed from 80µm/s to 32µm/s. This 2.5-fold decrease in speed is less than the 6.5-fold increase in viscosity from adding ficoll. Individual bacteria were manually tracked using time-lapse microscopy. Error bars represent standard error of the mean. Each bar represents the average of three biological replicates.



Supplementary Figure 8a

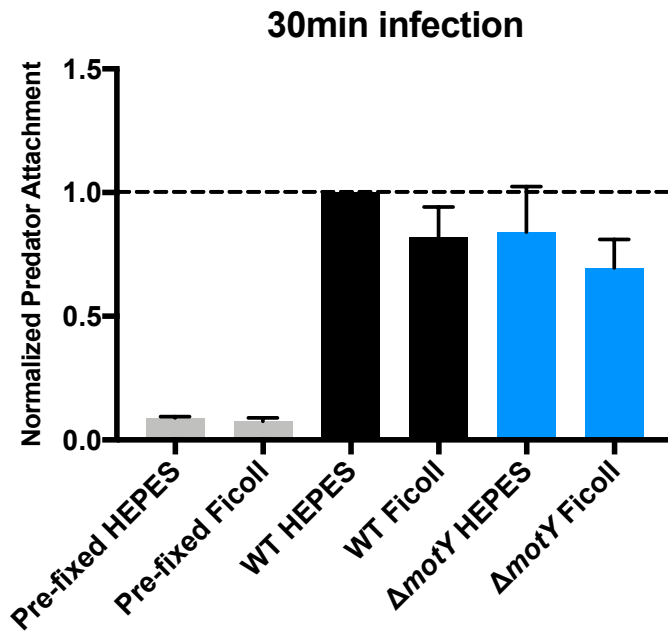

Supplementary Figure 8b

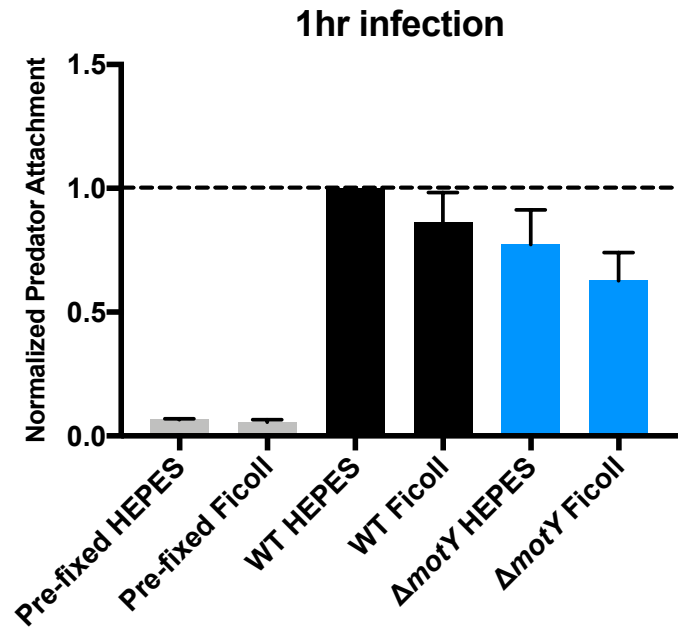

**Supplementary Figure 8. Increased viscosity does not significantly reduce predator-prey attachment.** Attachment was measured by flow cytometry at 30 minutes (a) or one hour (b) post infection in HEPES or 10% ficoll media. While both WT and  $\Delta$ motY *V. cholerae* showed a slight decrease in attachment, only the motile WT strain demonstrates improved survival in the high viscosity medium. Each bar shows the average of three biological replicates. Error bars represent standard error of the mean.

Supplementary Figure 9a

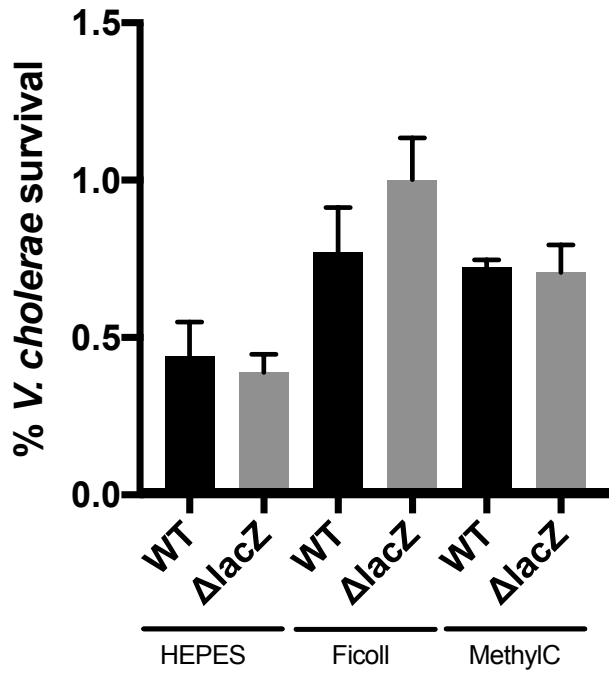

Supplementary Figure 9b

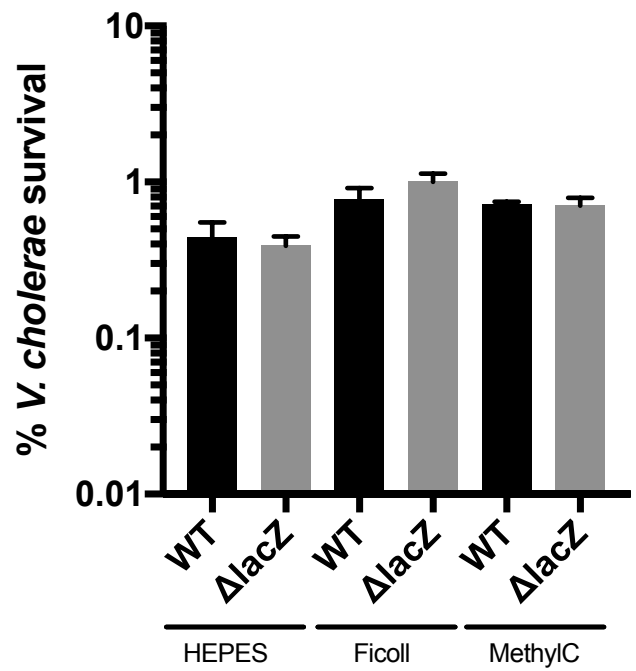

**Supplementary Figure 9. Increased viscosity does not alter the competitive index between WT *V. cholerae* and an isogenic  $\Delta lacZ$  strain. a-b,** Survival percentages are shown for the WT vs.  $\Delta lacZ$  controls from Fig. 4a and 4b. The survival rates are shown on a linear scale (a) and log scale (b) to allow comparison to the results in Figure 4a-b. Each bar shows the average of three biological replicates. Error bars represent standard error of the mean.

Supplementary Figure 10

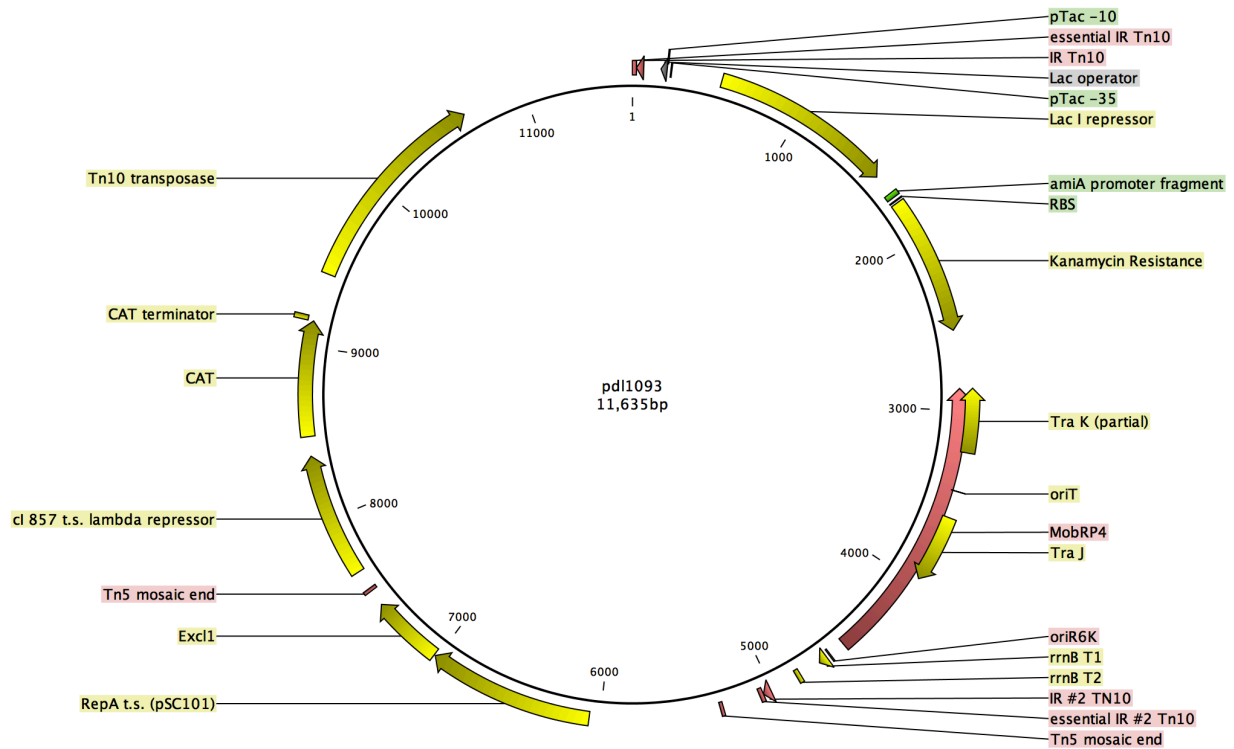

**Supplementary Figure 10. pDL1093, a temperature-sensitive mTn10 delivery vector.**

**Sequence:**

```

CTGATGAATCCCCTAATGATTTTGGTAAAATCATTAAAGTTAAGGTGGATACACATC
TTGTCATATGTCGAGTGCCACACAGATTGTCTGATAAATTGTTAAAGAGCAGTGCC
GCTTCGCTTTTTCTCAGCGGCCGCCCGAAACCATTGATCCTGTTTCCTGTGTGAAA
TTGTTATCCGCTCACAATTCCACACATTATACGAGCCGATGATTAATTGTCAACAGC
TCATTTTCAGAATATTTGCCAGAACCGTTATGATGTTCGGCGCAAAAACATTATCCAG
AACGGGAGTGCGCCTTGAGCGACACGAATTATGCAGTGATTTACGACCTGCACAG
CCATACCACAGCTTCCGATGGCTGCCTGACGCCAGAAGCATTGGTGCACCGTGCA
GTCGATGATAAGCTGTCAAACATGAGAATTCCCGGGAGAGCTCGGTACCCGACAC
CATCGAATGGTGCAAACCTTTCGCGGTATGGCATGATAGCGCCCGGAAGAGAGT
CAATTCAGGGTGGTGAATGTGAAACCAGTAACGTTATACGATGTCGCAGAGTATGC
CGGTGTCTCTTATCAGACCGTTTCCCGCGTGGTGAACCAGGCCAGCCACGTTTCTG
CGAAAACGCGGGGAAAAGTGGAAGCGGCGATGGCGGAGCTGAATTACATTCCCAA
CCGCGTGGCACAACAACACTGGCGGGCAAACAGTCGTTGCTGATTGGCGTTGCCACC
TCCAGTCTGGCCCTGCACGCGCCGTCGCAAATTGTTCGCGGCGATTAAATCTCGCG
CCGATCAACTGGGTGCCAGCGTGGTGGTGTTCGATGGTAGAACGAAGCGGCGTTCGA
AGCCTGTAAAGCGGCGGTGCACAATCTTCTCGCGCAACGCGTCAGTGGGCTGATC
ATTA ACTATCCGCTGGATGACCAGGATGCCATTGCTGTGGAAGCTGCCTGCACTAA
    
```

TGTTCCGGCGTTATTTCTTGATGTCTCTGACCAGACACCCATCAACAGTATTATTTT  
CTCCCATGAAGACGGTACGCGACTGGGCGTGGAGCATCTGGTCGCATTGGGTAC  
CAGCAAATCGCGCTGTTAGCGGGCCATTAAGTTCTGTCTCGGCGCGTCTGCGTCT  
GGCTGGCTGGCATAAATATCTCACTCGCAATCAAATTCAGCCGATAGCGGAACGGG  
AAGGCGACTGGAGTGCCATGTCCGGTTTTCAACAAACCATGCAAATGCTGAATGAG  
GGCATCGTTCCCACTGCGATGCTGGTTGCCAACGATCAGATGGCGCTGGGCGCAA  
TGCGCGCCATTACCGAGTCCGGGCTGCGCGTTGGTGCGGATATCTCGGTAGTGGG  
ATACGACGATAACGAAGACAGCTCATGTTATATCCCGCCGTTAACACCATCAAAC  
AGGATTTTCGCTGCTGGGGCAAACCAGCGTGGACCGCTTGCTGCAACTCTCTCA  
GGGCCAGGCGGTGAAGGGCAATCAGCTGTTGCCCGTCTCACTGGTGAAAGAAAA  
CCACCCTGGCGCCAATACGCAAACCGCCTCTCCCCGCGCGTTGGCCGATTCATT  
AATGCAGCTGGCACGACAGGTTTCCCGACTGGAAAGCGGGCAGTGAGCGCAACGC  
AATTAATGTAAGTTAGCTCACTCATTAGGCACCCAGGCTTTACACTTTATGCTTCC  
GACCTGCAGGTTTGATTTTTAATGGATAATGTGATATAATCTTTAAATACTGTAGAAA  
AGAGGAAGGAAATAATAAATGGCTAAAATGAGAATATCACCGGAATTGAAAAACT  
GATCGAAAAATACCGCTGCGTAAAAGATACGGAAGGAATGTCTCCTGCTAAGGTAT  
ATAAGCTGGTGGGAGAAAATGAAAACCTATATTTAAAATGACGGACAGCCGGTAT  
AAAGGGACCACCTATGATGTGGAACGGGAAAAGGACATGATGCTATGGCTGGAAG  
GAAAGCTGCCTGTTCCAAAGGTCCTGCACTTTGAACGGCATGATGGCTGGAGCAAT  
CTGCTCATGAGTGAGGCCGATGGCGTCCTTTGCTCGGAAGAGTATGAAGATGAACA  
AAGCCCTGAAAAGATTATCGAGCTGTATGCGGAGTGCATCAGGCTCTTTCACTCCA  
TCGACATATCGGATTGTCCCTATACGAATAGCTTAGACAGCCGCTTAGCCGAATTG  
GATTACTTACTGAATAACGATCTGGCCGATGTGGATTGCGAAAACCTGGGAAGAAGA  
CACTCCATTTAAAGATCCGCGCGAGCTGTATGATTTTTTAAAGACGGAAAAGCCCG  
AAGAGGAACTTGTCTTTTTCCACGGCGACCTGGGAGACAGCAACATCTTTGTGAAA  
GATGGCAAAGTAAGTGGCTTTATTGATCTTGGGAGAAGCGGCAGGGGCGGACAAGT  
GGTATGACATTGCCTTCTGCGTCCGGTCGATCAGGGAGGATATCGGGGAAGAACA  
GTATGTCGAGCTATTTTTTACTTACTGGGGATCAAGCCTGATTGGGAGAAAATAAA  
ATATTATATTTTACTGGATGAATTGTTTTAGGACGGGCTTGTCTGCTCCCGGCATCC  
GCTTACAGACAAGCTGTGACCGTCTCCGGGAGCTGCATGTGTGTCAGAGGTTTTACC  
GTCATCACCGAAACGCGCGAGGCAGCAAGGAGATGGCGCCCAACAGTCCCCCGG  
CCACGGGGCCTGCCACCATACCACGCCGAAACAAGCGCTCATGAGCCCGAAGTG  
GCGAGCCCGATCTTCCCATCGGTGATGTCGGCGATATAGGCGCCAGCAACCGCA  
CCTGTGGCGCCGGTGTATGCCGGCCACGATGCGTCCGGCGTAGAGGATCCTTTTTG  
TCCGGTGTGGGTTGAAGGTGAAGCCGGTCCGGGGCCGACGCGGGGGCCGGCTTT  
TCAGCCTTGCCCCCTGCTTCGGCCCGCGTGGCTCCGGCGTCTTGGGTGCCGGC  
GCGGGTTCCGCAGCCTTGGCCTGCGGTGCGGGCACATCGGCGGGCTTGGCCTTG  
ATGTGCCGCCTGGCGTGCGAGCGGAACGTCTCGTAGGAGAACTTGACCTTCCCCG  
TTTCCCGCATGTGCTCCCAAATGGTGACGAGCGCATAGCCGGACGCTAACGCCGC  
CTCGACATCCGCCCTCACCGCCAGGAACGCAACCGCAGCCTCATCACGCCGGCGC  
TTCTTGGCCGCGCGGGATTCAACCCACTCGGCCAGCTCGTCCGGTGTAGCTCTTTG  
GCATCGTCTCTCGCCTGTCCCCTCAGTTCAGTAATTTCTGCATTTGCCTGTTTCCA  
GTCGGTAGATATTCCACAAAACAGCAGGGAAAGCAGCGCTTTTCCGCTGCATAACCC  
TGCTTCCGGGGTCATTATAGCGATTTTTTCCGGTATATCCATCCTTTTTCGCACGATAT  
ACAGGATTTTGCCAAAGGGTTCGTGTAGACTTTCCTTGGTGTATCCAACGGCGTCA

GCCGGGCAGGATAGGTGAAGTAGGCCACCCGCGAGCGGGTGTTCCTTCTTCACT  
GTCCCTTATTCGCACCTGGCGGTGCTCAACGGGAATCCTGCTCTGCGAGGCTGGC  
CGGCTACCGCCGGCGTAACAGATGAGGGCAAGCGGATGGCTGATGAAACCAAGC  
CAACCAGGAAGGGCAGCCCACCTATCAAGGTGTACTGCCTTCCAGACGAACGAAG  
AGCGATTGAGGAAAAGGCGGGCGGCGGCGGCATGAGCCTGTGCGCCTACCTGCT  
GGCCGTGCGCCAGGGCTACAAAATCACGGGCGTTCGTGGACTATGAGCACGTCCGC  
GAGCTGGCCCGCATCAATGGCGACCTGGGCCGCTGGGCGGCCTGCTGAAACTC  
TGGCTCACCGACGACCCGCGCACGGCGCGGTTTCGGTGATGCCACGATCCTCGCC  
CTGCTGGCGAAGATCGAAGAGAAGCAGGACGAGCTTGGCAAGGTCATGATGGGCG  
TGGTCCGCCCGAGGGCAGAGCCATGACTTTTTTAGCCGCTAAAACGGCCGGGGGG  
TGCGCGTGATTGCCAAGCACGTCCCCATGCGCTCCATCAAGAAGAGCGACTTCGC  
GGAGCTGGTGAAGTACATCACCGACGAGCAAGGCAAGACCGAGCGCCTGGGTCA  
CGTGCGCGTCACGAACCTGCGAGGCAAACACCCTGCCCGCTGTCATGGCCGAGGTG  
ATGGCGACCCAGCACGGCAACACCCGTTCCGAGGCCGACAAGACCTATCACCTGC  
TGTTAGCTTCCGCGCGGGAGAGAAGCCCGACGCGGAGACGTTGCGCGCGATTG  
AGGACCGCATCTGCGCTGGGCTTGGCTTCGCCGAGCATCAGCGCGTCAGTGCCGT  
GCATCACGACACCGACAACCTGCACATCCATATCGCCATCAACAAGATTCACCCGA  
CCCGAAACACCATCCATGAGCCGTATCGGGCCTACCGCGCCCTCGCTGACCTCTG  
CGCGACGCTCGAACGGGACTACGGGCTTGAGCGTGACAATCACGAAACGCGGCA  
GCGCGTTTTCCGAGAACCGCGCGAACGACATGGAGCGGCACGCGGGCGTGGAAG  
CCTGGTCGGCTGGATCCGGCCACGATGCGTCCGGCGTAGAGGATCTGAAGATCAG  
CAGTTCAACCTGTTGATAGTACGTGCGCCGGCGGCATCAAATAAAACGAAAGGCTCA  
GTGAAAGACTGGGCCTTTTCGTTTTATCTGTTGTTTGTTCGGTGAACGCTCTCCTGA  
GTAGGACAAATCCGCCGGGAGCGGATTTGAACGTTGCGAAGCAACGGCCCGGAG  
GGTGGCGGGCAGGACGCCCGCCATAAACTGCCAGGCATCAAATTAAGCAGAAGGC  
CATCCTGACGGATGGCCTTTTTGCGTTTCTACAAACTCTTTTGTATTATTTTGTGAC  
TGTACAGCGGCCGCGGCCTAGGCGGCCACGCGTATTCAGGCTGACCCTGCGCGC  
TGCGCAGGGCTTTATTGATTCATTTTTACTGATGAATGTTCCGTTGCGCTGCC  
GGATTACAGCCGGATCCGGGATCATATGACAAGATGTGTATCCACCTTAACCTAAT  
GATTTTTACAAAATCATTAGGGGATTCATCAGTGCTCAGGGTCAACGAGAATTAAC  
ATTCCGTCAGGAAAGCTTATGATGATGATGTGCTTAAAACTTACTCAATGGCTGGT  
TTATGCAGATATCCATCACACTGGCGGCCGCTCGAGCATGCGTCGACTCTAGAGGA  
TCCGAGCTACTCCGTTACAAAGCGAGGCTGGGTATTTCCCGGCCTTTCTGTTATCC  
GAAATCCACTGAAAGCACAGCGGAGATGTGTATAAGAGACAGCTGGACAGTAAGA  
CGGGTAAGCCTGTTGATGATACCGCTGCCTTACTGGGTGCATTAGCCAGTCTGAAT  
GACCTGTCACGGGATAATCCGAAGTGGTCAGACTGGAAAATCAGAGGGCAGGAAC  
TGCTGAACAGCAAAAAGTCAGATAGCACACATAGCAGACCCGCCATAAAACGCC  
TGAGAAGCCCGTGACGGGCTTTTCTTGATTATGGGTAGTTTCCTTGATGAATCCA  
TAAAGGCGCCTGTAGTGCCATTTACCCCACTTCACTGCCAGAGCCGTGAGCGCA  
GCGAACTGAATGTCACGAAAAGACAGCGACTCAGGTGCCTGATGGTCGGAGACA  
AAAGGAATATTCAGCGATTTGCCCGAGCTTGCGAGGGTGCTACTTAAGCCTTTAGG  
GTTTTAAGGTCTGTTTTGTAGAGGAGCAAACAGCGTTTTCGACATCCTTTTGTATA  
CTGCGGAACTGACTAAAGTAGTGAGTTATACACAGGGCTGGGATCTATTCTTTTTAT  
CTTTTTTATTCTTTCTTTATTCTATAAATTATAACCACTTGAATATAAACAAAAAAA  
CACACAAAGGTCTAGCGGAATTTACAGAGGGTCTAGCAGAATTTACAAGTTTTCCA

GCAAAGGTCTAGCAGAATTTACAGATACCCACAACCTCAAAGGAAAAGGACTAGTAA  
TTATCATTGACTAGCCCATCTCAATTGGTATAGTGATTAATAACACCTAGACCAATT  
GAGATGTATGTCTGAATTAGTTGTTTTCAAAGCAAATGAACTAGCGATTAGTCGCTA  
TGACTTAACGGAGCATGAAACCAAGCTAATTTTATGCTGTGTGGCACTACTCAACCC  
CACGATTGAAAACCTACAAGGAAAGAACGGACGGTATCGTTCACCTATAACCAAT  
ACGCTCAGATGATGAACATCAGTAGGGAAAATGCTTATGGTGTATTAGCTAAAGCA  
ACCAGAGAGCTGATGACGAGAACTGTGGAAATCAGGAATCCTTTGGTTAAAGGCTT  
TGAGATTTTCCAGTGGACAACTATGCCAAGTTCTCAAGCGAAAAATTAGAATTAGT  
TTTTAGTGAAGAGATATTGCCTTATCTTTTCCAGTTAAAAAATTCATAAAATATAAT  
CTGGAACATGTTAAGTCTTTTGAACAATACTCTATGAGGATTTATGAGTGGTTA  
TTAAAAGAATAACACAAAAGAAAACCTACAAGGCAAATATAGAGATTAGCCTTGAT  
GAATTTAAGTTCATGTTAATGCTTGAATAACTACCATGAGTTTAAAAGGCTTAACC  
AATGGGTTTTGAAACCAATAAGTAAAGATTTAACACTTACAGCAATATGAAATTGG  
TGGTTGATAAGCGAGGCCGCCGACTGATACGTTGATTTTCCAAGTTGAACTAGAT  
AGACAAATGGATCTCGTAACCGAACTTGAGAACAACCAGATAAAAATGAATGGTGA  
CAAATACCAACAACCATTACATCAGATTCCTACCTACATAACGGACTAAGAAAAC  
ACTACACGATGCTTTAACTGCAAAAATTCAGCTCACCAGTTTTGAGGCAAAATTTTT  
GAGTGACATGCAAAGTAAGTATGATCTCAATGGTTCGTTCTCATGGCTCACGCAA  
ACAACGAACCACTAGAGAACATACTGGCTAAATACGGAAGGATCTGAGGTTCT  
TATGGCTCTTGTATCTATCAGTGAAGCATCAAGACTAACAAACAAAAGTAGAACAA  
TGTTACCCGTTACATATCAAAGGGAAAACCTGTCCATATGCACAGATGAAAACGGTGT  
AAAAAGATAGATACATCAGAGCTTTTACGAGTTTTTGGTGCATTCAAAGCTGTTCA  
CCATGAACAGATCGACAATGTAACAGATGAACAGCATGTAACACCTAATAGAACAG  
GTGAAACCAGTAAAACAAAGCAACTAGAACATGAAATTGAACACCTGAGACAACCT  
GTTACAGCTCAACAGTCACACATAGACAGCCTGAAACAGGCGATGCTGCTTATCGA  
ATCAAAGCTGCCGACAACACGGGAGCCAGTGACGCCTCCCGTGGGGAAAAAATCA  
TGGCAATTCTGGAAGAAATAGCGCTTTCAGCCGGCAAACCTGAAGCCGGATCTGC  
GATTCTGATAACAAACTAGCAACACCAGAACAGCCCGTTTTGCGGGCAGCAAAACCC  
GTCAGCTGTCTTATACACATCTCGTTGTTCCATACAACCTCCTTAGTACATGCAA  
CCATTATCACCGCCAGAGGTAATAAGTCAACACGCACGGTGTAGATATTTATCCC  
TTGCGGTGATAGATTTAACGTATGAGCACAAAAAAGAAACCATTAACACAAGAGCA  
GCTTGAGGACGCACGTGCGCTTAAAGCAATTTATGAAAAAAGAAAAATGAACTTG  
GCTTATCCCAGGAATCTGTGCGCAGACAAGATGGGGATGGGGCAGTCAGGCGTTGG  
TGCTTTATTTAATGGCATCAATGCATTAATGCTTATAACGCCGCATTGCTTACAAAA  
ATTCTCAAAGTTAGCGTTGAAGAATTTAGCCCTTCAATCGCCAGAGAAATCTACGAG  
ATGTATGAAGCGGTTAGTATGCAGCCGTCACCTAGAAGTGAGTATGAGTACCCTGT  
TTTTTCTCATGTTTACGGCAGGGATGTTCTCACCTAAGCTTAGAACCTTTACCAAAGG  
TGATGCGGAGAGATGGGTAAGCACAAACCAAAAAAGCCAGTGATTCTGCATTCTGGC  
TTGAGGTTGAAGGTAATTCCATGACCGCACCAACAGGCTCCAAGCCAAGCTTTTCT  
GACGGAATGTTAATTCTCGTTGACCCTGAGCAGGCTGTTGAGCCAGGTGATTTCTG  
CATAGCCAGACTTGGGGGTGATGAGTTTACCTTCAAGAACTGATCAGGGATAGCG  
GTCAGGTGTTTTTACAACCACTAAACCCACAGTACCCAATGATCCCATGCAATGAGA  
GTTGTTCCGTTGTGGGGAAAGTTATCGCTAGTCAGTGGCCTGAAGAGACGTTTGGC  
TGATCGGCAAGGTGTTCTGGTCCGGCGCATAGCTGATAACAATTGAGCAAGAATCTT  
CATCGAATTAGGGGAATTTTCACTCCCCTCAGAACATAACATAGTAAATGGATTGAA

TTATGGAGAAAAAATCACTGGATATACCACCGTTGATATATCCCAATGGCATCGTA  
AAGAACATTTTGGAGGCATTTTCAGTCAGTTGCTCAATGTACCTATAACCAGACCGTTC  
AGCTGGATATTACGGCCTTTTTAAAGACCGTAAAGAAAAATAAGCACAAAGTTTTATC  
CGGCCTTTATTACATTCTTGCCCGCCTGATGAATGCTCATCCGGAATTCCGTATG  
GCAATGAAAGACGGTGAGCTGGTGTATATGGGATAGTGTTACCCTTGTTACACCGT  
TTTCCATGAGCAAACCTGAAACGTTTTTCATCGCTCTGGAGTGAATACCACGACGATTT  
CCGGCAGTTTCTACACATATATTGCAAGATGTGGCGTGTTACGGTGAAAACCTGG  
CCTATTTCCCTAAAGGGTTTATTGAGAATATGTTTTTCGTCTCAGCCAATCCCTGGG  
TGAGTTTCACCAGTTTTGATTTAAACGTGGCCAATATGGACAACCTTCTTCGCCCCCG  
TTTTACCATGGGCAAATATTATACGCAAGGCGACAAGGTGCTGATGCCGCTGGCG  
ATTCAGGTTTCATCATGCCGTCTGTGATGGCTTCCATGTCGGCAGAATGCTTAATGA  
ATTACAACAGTACTGCGATGAGTGGCAGGGCGGGGCGTAACCCGGCCTCAGCGCC  
GGGTTTTCTTGCCTCACGATCGCCCCAAAACACATAACCAATTGTATTTATTGAA  
AAATAAATAGATACTCACTAACATAGCAATTCAGATCTCTCACCTACCAAACA  
ATGCCCCCTGCAAAAATAAATTCATATAAAAAACATACAGATAACCATCTGCGGT  
GATAAATTATCTCTGGCGGTGTTGACATAAATACCACTGGCGGTGATACTGAGCAC  
ATCAGCGAGCTCAAAAATCAATAATCAGACAACAAGATGTGCGAACTCGATATTTTA  
CAGACTCTCTTTACCAATTCTGCCCCGAATTACACTTAAAACGACTCAACAGCTTA  
ACGTTGGCTTGCCACGCATTACTCAATTGTAAAACCTCTCACTCTTACCGAACTTGGC  
CGTAACCTGCCAACCAAAGCGAGAACAACATAACATCAAACGAATCGACCGATT  
GTTAGGTAATCGTCACCTCCACAAAGAGCGACTCGCTGTATACCGTTGGCATGCTA  
GCTTTATCTGTTCCGGCAATACGATGCCCATTTGTAATTGTTGACTGGTCTGATATTC  
GTGAGCAAAAACGACTTATGGTATTGCGAGCTTCAGTCGCACTACACGGTCGTTCT  
GTTACTCTTTATGAGAAAGCGTTCCCGCTTTCAGAGCAATATTCAAAGAAAGCTCAT  
GACCAATTTCTAGCCGACCTTGCGAGCATTCTACCGAGTAACACCACACCGCTCAT  
TGTCAGTGATGCTGGCTTTAAAGTGCCATGGTATAAATCCGTTGAGAAGCTGGGTT  
GGTACTGGTTAAGTCGAGTAAGAGGAAAAGTACAATATGCAGACCTAGGAGCGGAA  
AACTGGAAACCTATCAGCAACTTACATGATATGTCATCTAGTCACTCAAAGACTTTA  
GGCTATAAGAGGCTGACTAAAAGCAATCCAATCTCATGCCAAATTCTATTGTATAAA  
TCTCGCTCTAAAGGCCGAAAAAATCAGCGCTCGACACGTACGCATTATCACCACCC  
GTCACCTAAAATCTACTCAGCGTCCGGCAAAGGAGCCATGGGTTCTAGCAACTAACT  
TACCTGTTGAAATTCGGACACCCAAACAACCTTGTTAATATCTATTTCGAAGCGAATGC  
AGATTGAAGAAACCTTCCGAGACTTGAAAAGTCTGCCTACGGACTAGGCCTACGC  
CATAGCCGAACGAGCAGCTCAGAGCGTTTTGATATCATGCTGCTAATCGCCCTGAT  
GCTTCAACTAACATGTTGGCTTGCGGGCGTTCATGCTCAGAAACAAGGTTGGGACA  
AGCACTTCCAGGCTAACACAGTCAGAAATCGAAACGTA CTCTCAACAGTTCGCTTA  
GGCATGGAAGTTTTGCGGCATTCTGGCTACACAATAACAAGGGAAGACTTACTCGT  
GGCTGCAACCCTACTAGCTCAAATTTATTACACATGGTTACGCTTTGGGGAAATT  
ATGAGGGGATCTCTCAGTGCATTGCCTCCAATTTCCATAATTTATTACGCCGATAAT  
AACTTGGTGTAACCTTAAAATGTACTTAAATCGACGTGTAAAAGATTGTTGGGAAT  
CAAATTGATATTTAATGCGATCTCAAGGATAGTTTTTTTTCGTCAACCTCAACTCAAC  
AGCCGCTTTTCGTCAAACGACGAGCACGAATATAGCTAGCCAGTGTGACCCCTGTTA  
CTTTTTGAACAGCCGCTGAAAATACCACTTGGTATAACCCGCTTTATTGCCACATC  
ATCAAGCAGTAAAGACTGATCTAAATTATGTTCAATCCATAATAGAACATCTTTGATA  
ACCGTTGTATGAAACTGCTTATCATCATATCTTAATTGGATGTTATTAGCTTTATTTT

GATAGCGAGAATGCTGTTCAATATACATAAAATAACCTAAATGTTCTTAAGATTGTCA  
CGACCACATCATCATGATACCATAAACATACTGACGGTATGTTATTTTAAATCTATCA  
TGAAAATAAAAATCATCAACAAGAAAATTTTAAGAGTACCTATCAATCACTGGTTAA  
CTCAGCACGAATATTGTTTGTGAAAAAGGCTATCAAGCTGTTTCAATAGATGAGAT  
CGATCTCGGGAAAAGCGTTGGTGACCAAAGGTGCCTTTTATCATCACTTTAAAAATA  
AAAAACAATTACTCAGTGCCTGTTATAAGCAGCAATTAATTATGATTGATGCCTACAT  
CACAACAAAACTGATTTAACAAATGGTTGGTCTGCCTTAGAAAGTATATTTGAACA  
TTATCTTGATTATATTATTGATAATAATAAAAACCTTATCCCTATCCAAGAAGTGATG  
CCTATCATTGGTTGGAATGAACTTGAAAAAATTAGCCTTGAATACATTACTGGTAAG  
GTAAACGCCATTGTCAGCAAATTGATCCAAGAGAACCAACTTAAAGCTTTCCTGACG  
GAATGTTAATTCTCGTTGACCCTGAGCA



## Supplementary Methods

**Transmission electron microscopy (TEM).** TEM was performed as previously described<sup>1</sup> using overnight cultures of cells grown in LB broth, washed with PBS, spotted on formvar coated grids, strained with uranyl acetate (1%) and viewed with a JEM-1210 electron microscope. At least 10 individual bacteria were imaged for each of the *V. cholerae* strains.

**Phenol extraction of LPS.** LPS was extracted and analyzed as previously described<sup>2</sup>. Briefly, phenol extraction was performed using phase-lock gel light tubes (Eppendorf). Extracts were centrifuged at 75,000× g for 60 min, the pellet was washed with TM buffer and centrifuged as before. Purified LPS was separated on a 4–12% NuPage Bis-Tris gel (Invitrogen) and visualized by silver-staining (SilverQuest, Invitrogen). The concentration of *V. cholerae* LPS was determined by comparison to a standard curve of *E. coli* O26:B6 LPS (Sigma) using a Fujifilm FLA-900 scanner.

***V. cholerae* speed determination.** Bacterial speed was determined as previously described<sup>3</sup>. Briefly, overnight *V. cholerae* cultures were resuspended in HEPES buffer or HEPES buffer with 10% Ficoll 400. Samples were imaged using dark-field microscopy at 40x magnification using a Nikon Eclipse 80i fluorescence microscope. Time-lapse images were taken every 0.4 seconds. At least 40 individual bacteria were manually tracked in the movies using ImageJ, and these distances were compared to the number of frames observed to calculate *V. cholerae* speed in  $\mu\text{m}/\text{second}$ .

**Movies of *V. cholerae* dragging *B. bacteriovorus*.** We infected *V. cholerae* at MOI 10 with *B. bacteriovorus* in HEPES buffer as done for previous experiments. After 20 minutes of infection, we diluted the samples 1:10 into HEPES buffer and observed the predator-prey interactions using a Revolve microscope (Echo) at 90x magnification. We used iMovie software (Apple) to slow the movies to 0.25x full speed and insert annotation.

## Supplementary References

- 1 Kalivoda, E. J., Brothers, K. M., Stella, N. A., Schmitt, M. J. & Shanks, R. M. Bacterial cyclic AMP-phosphodiesterase activity coordinates biofilm formation. *PLoS One* **8**, e71267, doi:10.1371/journal.pone.0071267 (2013).
- 2 Seed, K. D. *et al.* Phase variable O antigen biosynthetic genes control expression of the major protective antigen and bacteriophage receptor in *Vibrio cholerae* O1. *PLoS Pathog* **8**, e1002917, doi:10.1371/journal.ppat.1002917 (2012).
- 3 Butler, S. M. & Camilli, A. Both chemotaxis and net motility greatly influence the infectivity of *Vibrio cholerae*. *Proc Natl Acad Sci U S A* **101**, 5018-5023, doi:10.1073/pnas.0308052101 (2004).
